# Supplementary material for: Chromonic Ionic Liquid Crystals Forming Nematic and Hexagonal Columnar Phases
Source: MDPI journal article supplement (doi:10.3390/cryst12111548), 2022-10-29
Supplement: s1 [file s1]

## Supplemental Information for

# Chromonic Ionic Liquid Crystals Forming Nematic and Hexagonal Columnar Phases

Takahiro Ichikawa\*, Mei Kuwana, Kaori Suda

Department of Biotechnology, Tokyo University of Agriculture and Technology, Nakacho, Koganei, Tokyo 184-8588, Japan

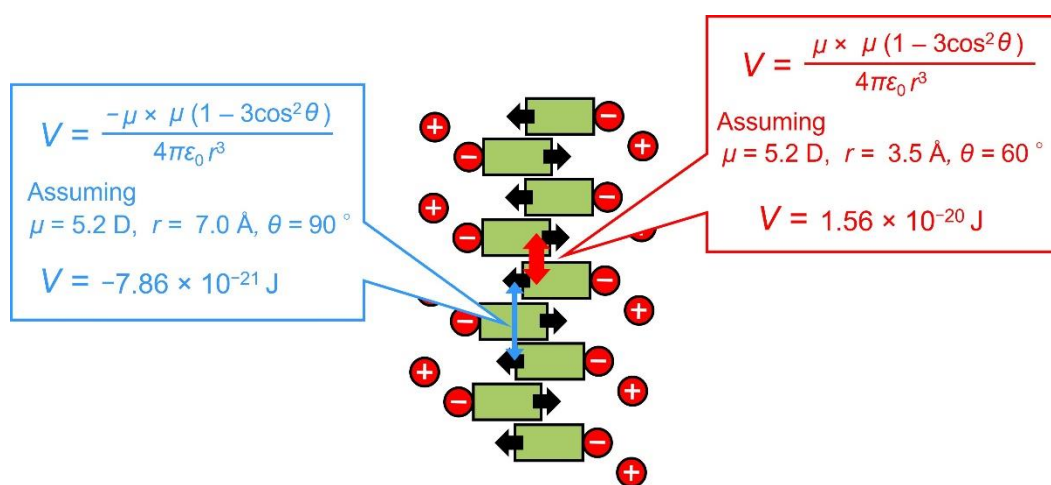

**Figure S1.** A schematic illustration of the cross section of the columnar structure of the **pQpdS-Ch/H<sub>2</sub>O** mixture. Rough calculation of dipole-dipole interactions in the column of the **pQpdS-Ch/H<sub>2</sub>O** mixture (X=50) is carried out as below. The number of **pQpdS-Ch** molecules in a 1 mg of the **pQpdS-Ch/H<sub>2</sub>O** mixture (X=50) is  $4.09 \times 10^{17}$ . Using these values, the potential energy by the dipole-dipole interaction can be roughly calculated to be 3.2 mJ/mg. This is roughly consistent with the value of 2.2 mJ/mg from the endothermic peak area of the DSC chart on heating.

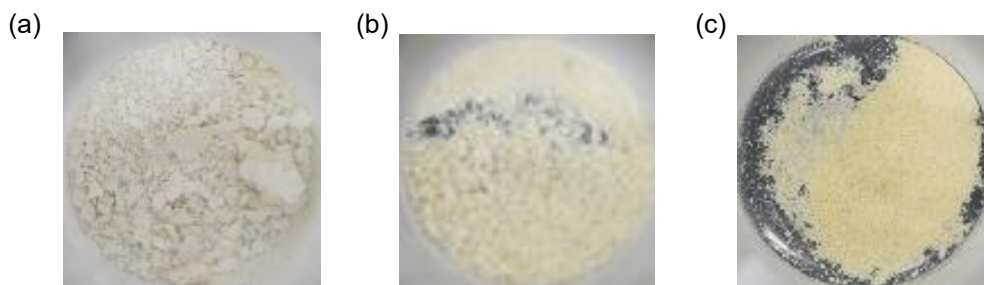

**Figure S2.** Pictures of: (a) **pQpdS-Ch**; (b) **pQpdS-Li**; and (c) **pQpdS-Na**.

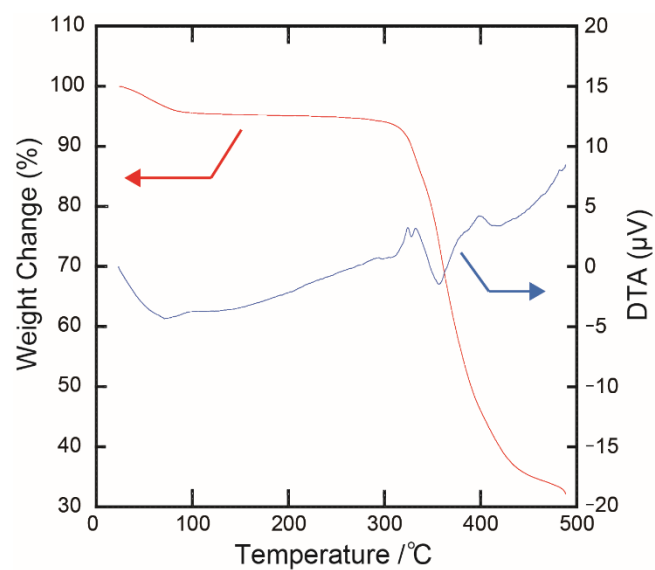

**Figure S3.** TG-DTA analysis result of **pQpdS-Ch**. It was found that **pQpdS-Ch** shows a thermal decomposition at around 320 °C. Since the thermal decomposition of **pQpdS-Ch** occurs before it melts, it was impossible to determine the melting temperature of **pQpdS-Ch**.
